# Supplementary material for: Ammonia recovery and fouling mitigation of hydrolyzed human urine treated by nanofiltration and reverse osmosis
Source: Royal Society of Chemistry journal article supplement (doi:10.1039/d1ew00601k), 2022-01-01
Supplement: d1ew00601k1.pdf [file d1ew00601k1.pdf]

1 **Ammonia recovery and fouling mitigation of hydrolyzed**  
2 **human urine treated by nanofiltration and reverse osmosis**

3  
4  
5 **Hannah Ray<sup>ab\*</sup>, Francois Perreault<sup>a</sup>, and Treavor H. Boyer<sup>ab</sup>**

6  
7  
8 **<sup>a</sup>School of Sustainable Engineering and the Built Environment (SSEBE)**  
9 **Arizona State University**  
10 **P.O. Box 873005, Tempe, Arizona, 85287-3005, USA**

11  
12 **<sup>b</sup>Biodesign Swette Center for Environmental Biotechnology**  
13 **Arizona State University**  
14 **P.O. Box 873005, Tempe, Arizona, 85287-3005, USA**

15  
16 **\*Corresponding author**  
17 **Tel.: 1-418-6899**  
18 **E-mail addresses: [hgray3@asu.edu](mailto:hgray3@asu.edu) (H. Ray).**

19  
20  
21  
22 **SUPPLEMENTAL MATERIALS**

23  
24 17 pages

25  
26 6 figures

27  
28 3 table

46 **1. Materials and Methods**

47 **1.1 Urine collection, storage, and safe handling.** Real fresh, undiluted urine was collected from  
48 anonymous volunteers, both male and female, who fit the criteria: (1) 18 years or older and (2)  
49 not pregnant. A urine collection setup was used in both male and female bathrooms in the  
50 Biodesign Institute at Arizona State University. Number of donors and ratio of male to female is  
51 not known due to anonymity requirements by the Institutional Review Board (IRB) which  
52 granted the project's human urine collection. Collection setups utilized plastic collection trays  
53 for women and urinal collection tanks for men. Thorough directions with both words and  
54 pictures were taped to the wall for understanding on how to properly donate. All collection trays  
55 were used once and then bleach cleaned for the next collection event. Gloves were available if  
56 desired for the anonymous volunteers. The collection tanks were kept in secondary containment  
57 throughout the collection event. All samples were combined during the collection event to ensure  
58 anonymity. Additional human urine was collected from the nonwater urinal system in the  
59 Biodesign Institute C building on Arizona State University campus. The urine was collected and  
60 subsequently mixed with the previously described fresh urine collected from donors. The  
61 collected human urine was stored in the lab for at least six months to allow for complete  
62 hydrolysis of the urea to occur. Personal protection equipment of gloves, a lab coat, and splash  
63 glasses were used when handling urine for experiments. Bleach was readily available for  
64 disinfection and biological spill kits were kept in the lab<sup>1</sup>.

65

66 **1.2 Microfiltration pretreatment**

67 Spectrapure microfiltration (MF) systems were used to pretreat the urine. A 1  $\mu\text{m}$  sediment filter  
68 cartridge (L-SF-MT-1-10) followed by a 0.2  $\mu\text{m}$  ZetaZorb sediment filter cartridge (L-SF-ZZ-

69 0.2ABS-10) were used to process the urine after the pH of the urine was altered. A dual position  
70 housings fitting mounting bracket (FA-2STA-10) with a Cole-Parmer Masterflex L/S digital  
71 pump with an Easy-Load II pump head were used. All filter diameters were 25.4 cm. The  
72 Spectrapure MF membranes were chosen as they were a local, commercially available, cost-  
73 effective option that should effectively remove suspended solids and bacteria based on the pore  
74 sizes.

### 75 **1.3 Analytical methods**

76 Ammonia and urea results were confirmed through analysis of Total Nitrogen (TN). Four check  
77 standards were used for each TOC/TN run: TN 5, TN 1, TOC 10, and TOC 5 mg/L. The criteria  
78 for accuracy was within 10% of check standards, and the criteria for precision was samples run  
79 in duplicate.

80         The RO feed tank foulant was collected and suspended in nanopure water. Cells were  
81 then collected by centrifugation (5,000×g, 1 min) and the pellet fixed in Karnovsky's fixative  
82 (2% paraformaldehyde, 2.5% glutaraldehyde in 0.2 M Sorenson's buffer, pH= 7.2) overnight at  
83 4°C. The fixed cells were washed once with Dulbecco's Phosphate Buffered Saline (DPBS),  
84 adhered to poly-L-lysine coated coverslips, and then washed two additional times with DPBS.  
85 Secondary fixation was done with 1% OsO<sub>4</sub> in DPBS for 1h at room temperature, followed by  
86 three washes with DI water. Cells were dehydrated with an ascending series of ethanol solutions  
87 followed by critical-point drying using a CPD-020 unit (Balzers-Union, Principality of  
88 Liechtenstein) with liquid CO<sub>2</sub> as the transition fluid. The dried samples were mounted on  
89 aluminum stubs and coated with 10-12 nm of gold-palladium using a Hummer II sputter coater  
90 (Technics, San Jose, CA). Imaging was done on a JSM 6300 SEM (JEOL USA, Peabody, MA)

91 operated at 15 kV and images were captured with an IXRF Systems model 500 digital processor  
92 (IXRF System Inc., Austin, TX).

### 93 **1.4 Economic Analysis**

94 The RO and NF process costs were calculated by adding the following costs together: MF  
95 operating cost, pH adjustment with NaOH cost, the RO and NF operation and maintenance costs  
96 for a system performing at 80% recovery, and the annual capital costs for the RO and NF  
97 systems. All costs were taken from published studies (cited in the discussion text) besides the  
98 cost of the NaOH which was derived based on dose and prices taken from Alibaba. The actual  
99 derivation of the operating cost is defined as:  $\$0.06/\text{m}^3 + \$4.50/\text{m}^3 + \$0.14/\text{m}^3$  for RO ( $\$0.11/\text{m}^3$   
100 for NF) +  $\$0.014/\text{m}^3$  for RO ( $\$0.016/\text{m}^3$  for NF) =  $\$4.72/\text{m}^3$  for RO and  $\$4.69/\text{m}^3$  for NF.

101

102 For the economic comparison, the total FO operating costs ( $\$10.11/\text{m}^3$ ,  $\$35.31/\text{m}^3$ , and  
103  $\$65.91/\text{m}^3$ ) include: MF operating cost ( $\$0.06/\text{m}^3$  based on work by Chellam et al. <sup>2</sup>), the cost of  
104 pH adjustment with NaOH ( $\$1.50/\text{m}^3$  based on the required dose of NaOH to raise the pH given  
105 in the methods section and the price of NaOH,  $\$0.3/\text{kg}^3$ ), the cost of the draw solute, and the cost  
106 of FO operation ( $\$1.65/\text{m}^3$  based on work by Volpin et al.<sup>4</sup>). The cost of the draw solute was  
107 derived based on chemical type ( $\text{KH}_2\text{PO}_4$  and  $\text{MgSO}_4$ ), dose (2 L of either 1.5 M or 0.75 M  
108 depending on the condition), and prices take from Alibaba. Full cost breakdowns for the FO  
109 system can be found in the economic assessment by Ray et al. <sup>5</sup>. The cost for ammonia air  
110 stripping was based on work by Liu et al. which determined the most optimized conditions  
111 resulted in an operating cost of  $\$21.65\text{--}24.24/\text{m}^3$  <sup>6</sup>. The cost for ammonium adsorption by ion  
112 exchange ( $\$11.70/\text{m}^3$ ) was derived from adding the cost of the ion exchange material (Dowex

113 Mac 3 resins performed for 100 = \$7.50/m<sup>3</sup> <sup>7)</sup> and the cost of sulfuric acid regeneration

114 (\$4.20/m<sup>3</sup> <sup>8)</sup>).

115

116

117

118

119

120

121

122

123

124

125

126

127

128

129

130

131

132

133

134

135

136 2. Figures and Tables

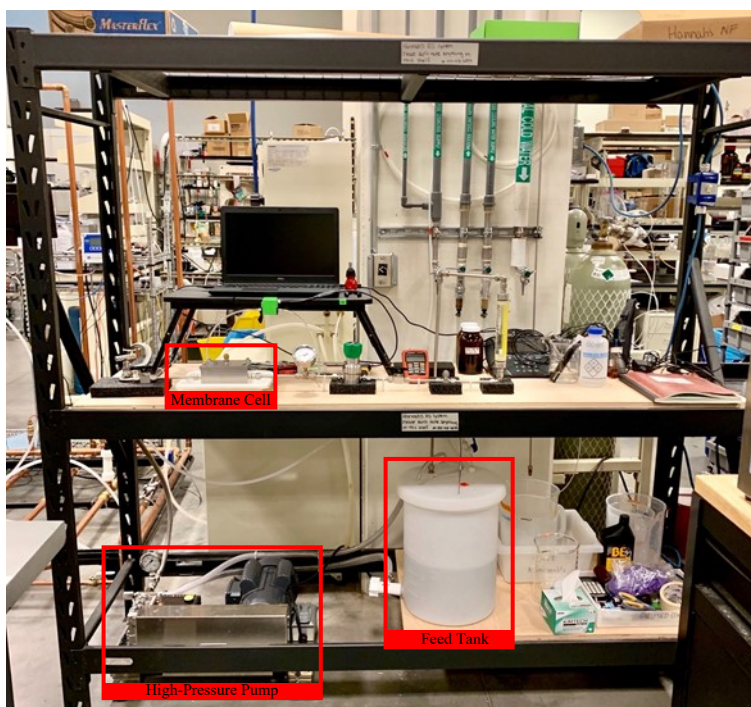

Figure S1. A picture of the RO and NF membrane setup used for all experiments,

137

138

139

140

141

142

143

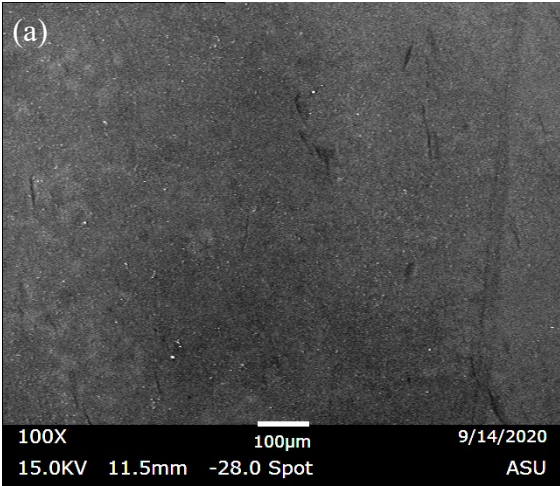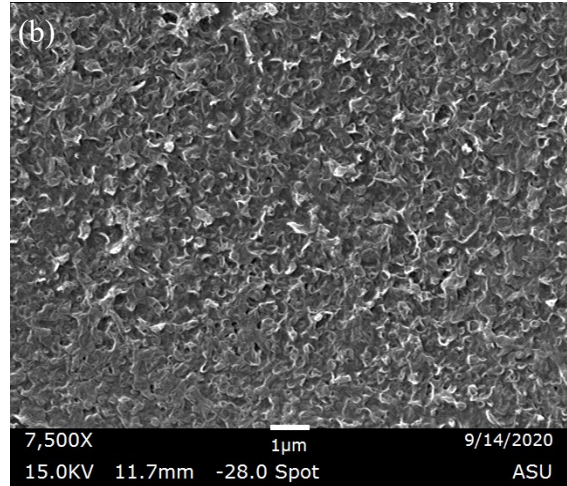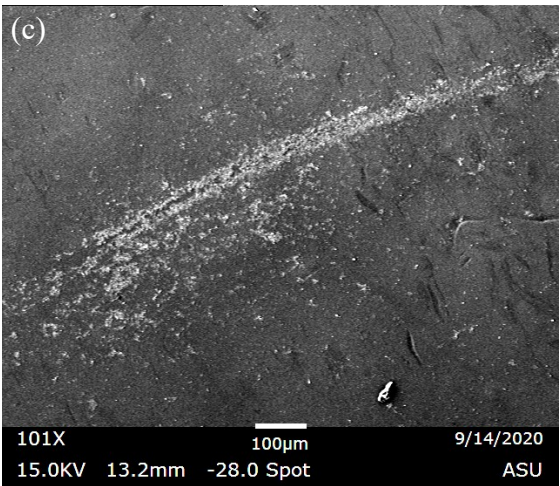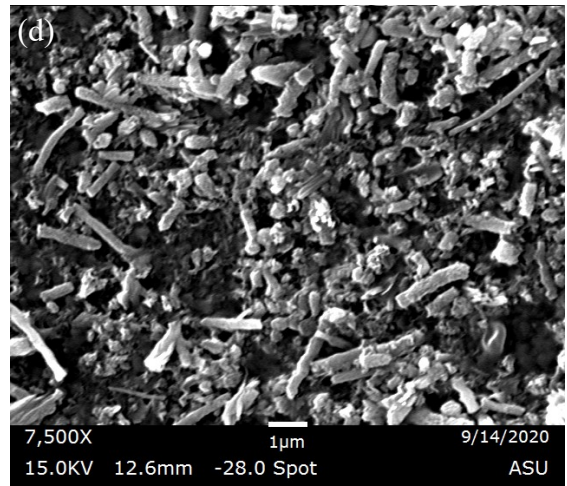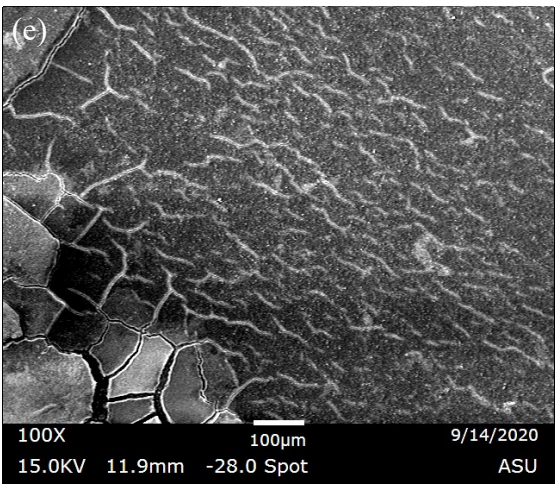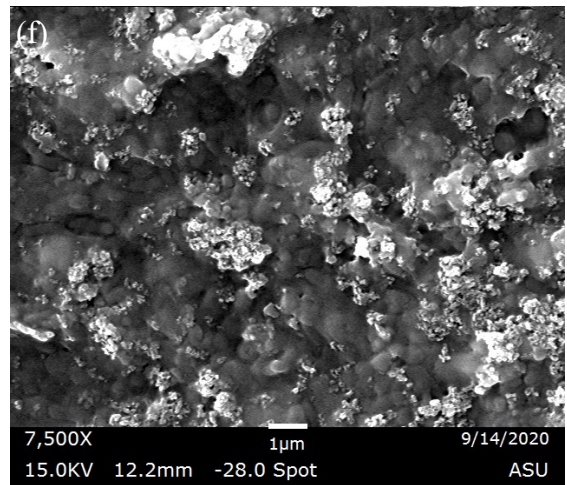

**Figure S2.** Scanning Electron Microscopy (SEM) images of the reverse osmosis membrane surface for the duplicate fouling tests. (a) control 100X, (b) control 7500X, (c) MF RO condition 100X, (d) MF

RO condition 7500X, (e) Non-MF RO condition 100X, and (f) Non-MF RO condition 7500X.

144

145

146

147

148

149

150

151

152

153

154

155

156

157

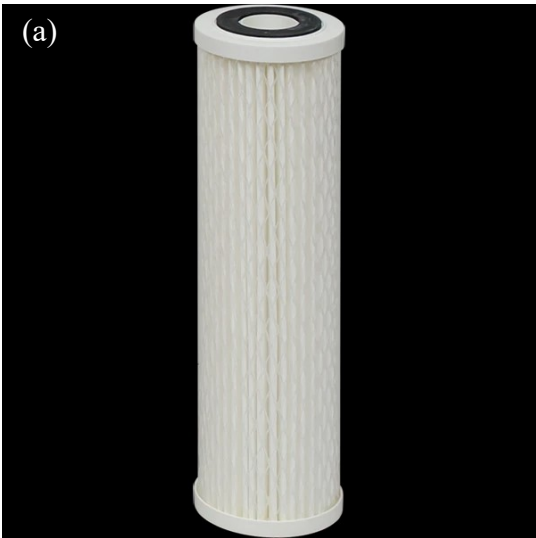



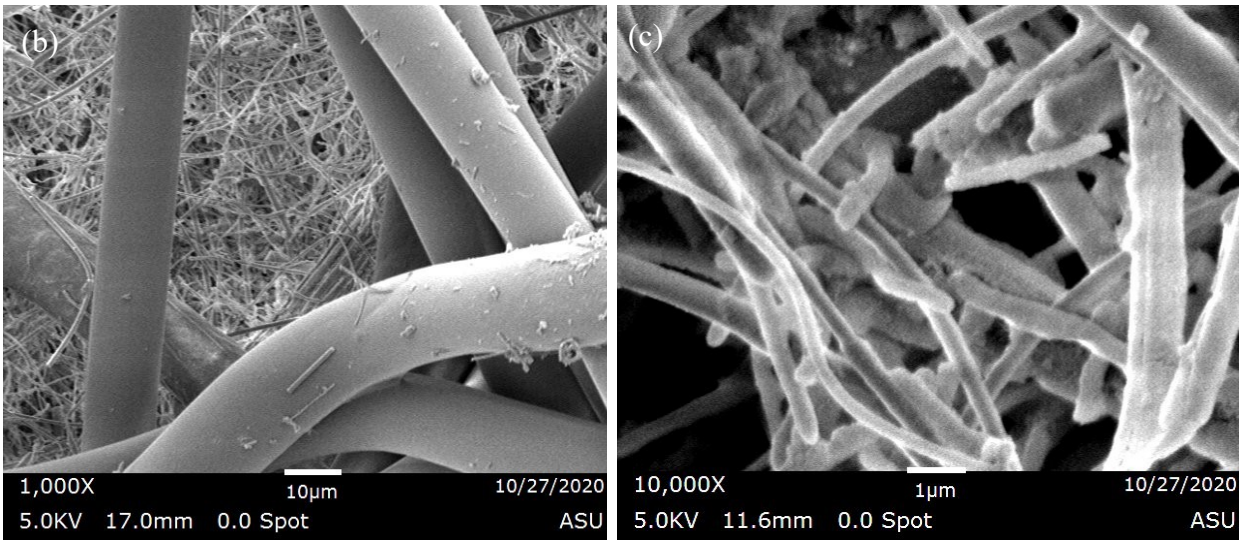

**Figure S3.** Scanning Electron Microscopy (SEM) images of microfiltration (MF) filter that was used to pretreat the hydrolyzed human urine. (a) the MF filter, (b) sample at 1000X, and (c) sample at 10,000X.

158

159

160

161

162

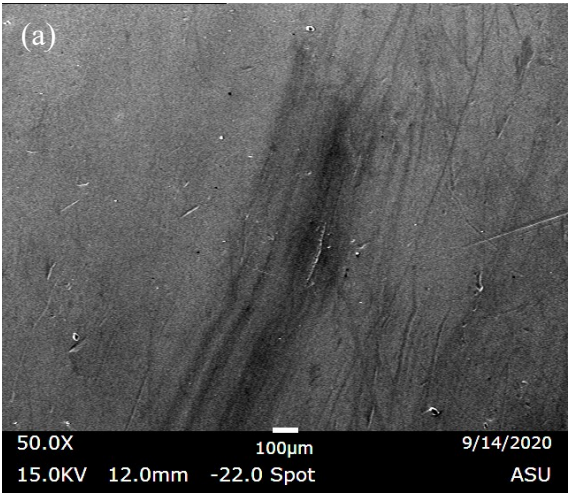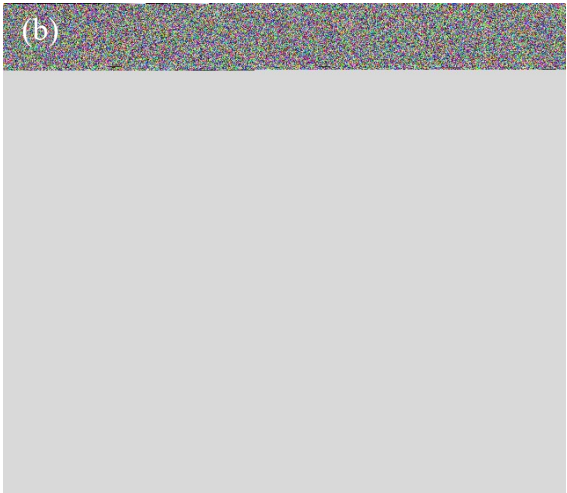

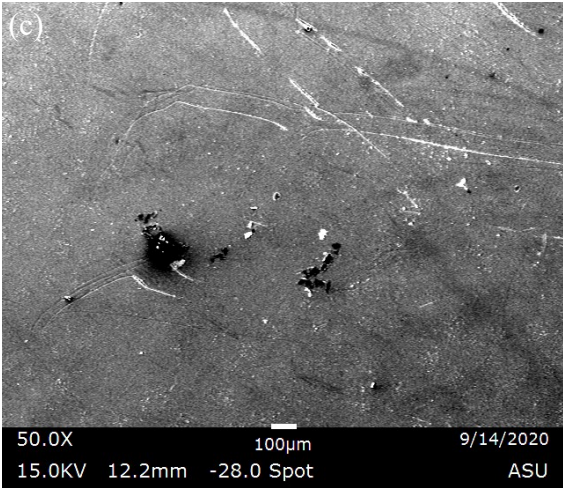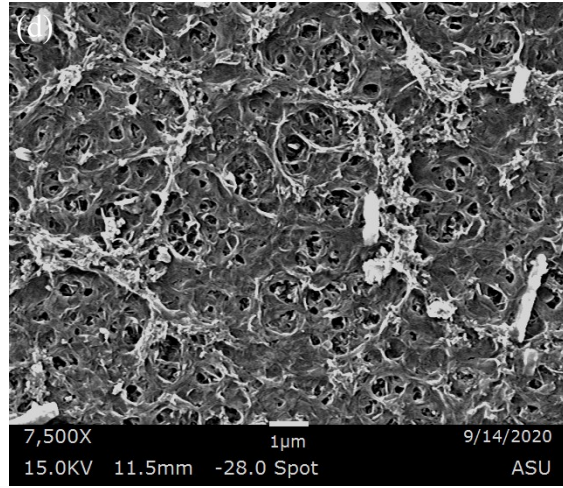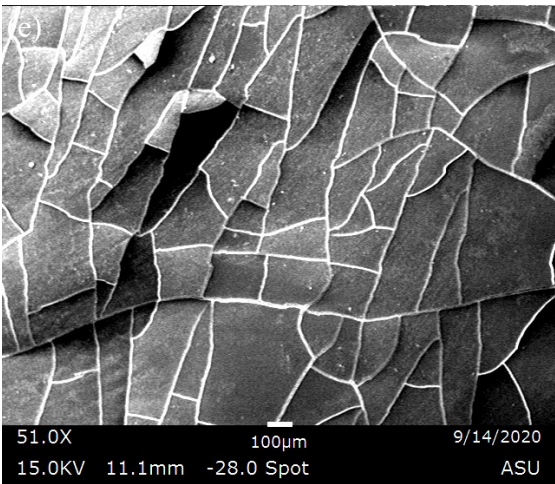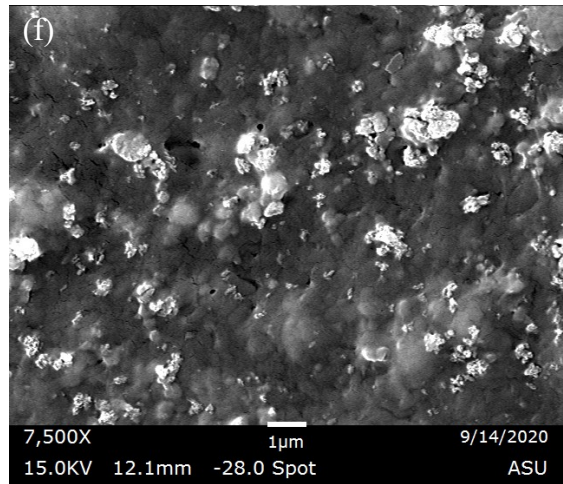

**Figure S4.** Scanning Electron Microscopy (SEM) images of the nanofiltration membrane surface for the duplicate fouling tests. (a) control 50X, (b) control 7500X, (c) MF NF condition 50X, (d) MF NF condition 7500X, (e) Non-MF NF condition 50X, and (f) Non-MF NF condition 7500X.

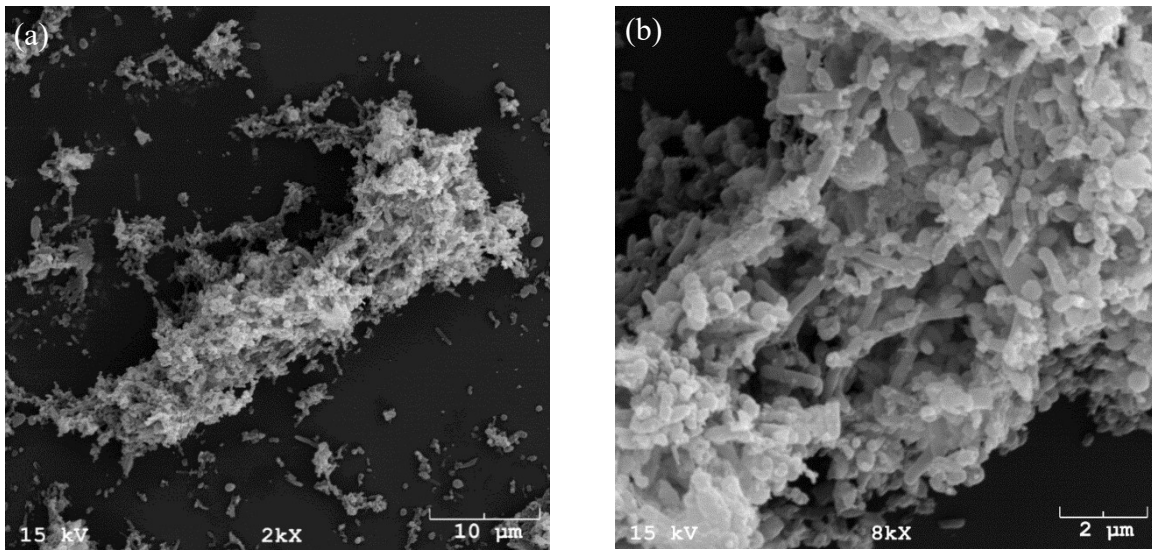

**Figure S5.** Scanning Electron Microscopy (SEM) images of the foulant which grew in the tank during the duplicate non-MF RO experiment. (a) sample at 2000X and (b) sample at 8000X.

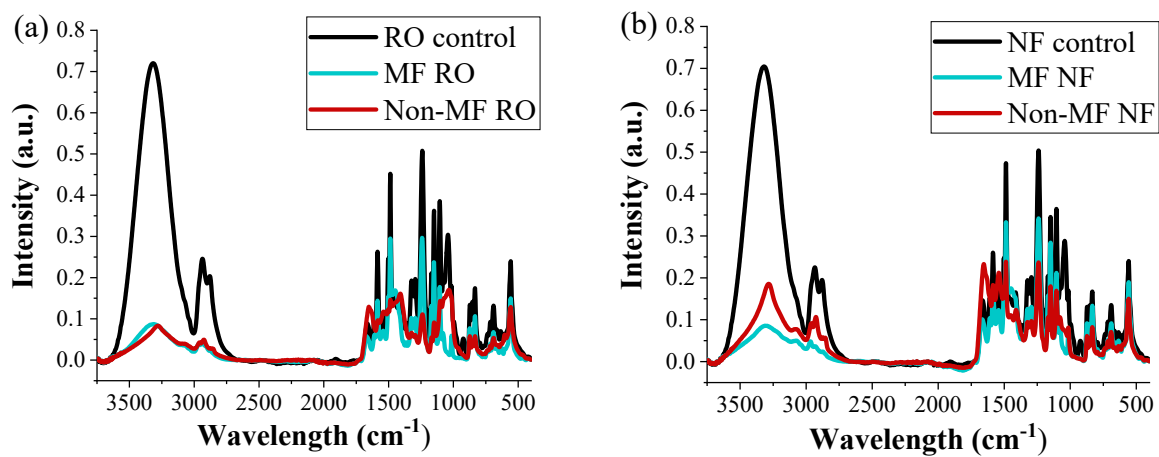

**Figure S6.** Fourier-transform infrared spectroscopy (FTIR) of the membrane surfaces for the duplicate reverse osmosis and nanofiltration tests. (a) FTIR results for the 2 conditions and control membrane for reverse osmosis. (b) FTIR results for the 2 conditions and control membrane for nanofiltration.

163

164

165

166

167

## Initial Urine Composition - Fouling Tests

| Membrane Process                                                                                | Condition       | pH                | Conductivity (mS/cm) | Ammonia (mg/L N) | Total N (mg/L N) | TOC (mg/L C) | PO <sub>4</sub> <sup>3-</sup> (mg/L PO <sub>4</sub> ) | SO <sub>4</sub> <sup>2-</sup> (mg/L SO <sub>4</sub> ) | Cl <sup>-</sup> (mg/L) | K <sup>+</sup> (mg/L) | Na <sup>+</sup> (mg/L) |
|-------------------------------------------------------------------------------------------------|-----------------|-------------------|----------------------|------------------|------------------|--------------|-------------------------------------------------------|-------------------------------------------------------|------------------------|-----------------------|------------------------|
| Membrane Process                                                                                | Nanofiltration  | Non-MF Pretreated | 11.45                | 30.74            | 2980             | 4300         | 1990                                                  | 521                                                   | 521                    | 2770                  | 1110                   |
|                                                                                                 |                 | Duplicate         | 11.42                | 32.69            | 2920             | 4300         | 1940                                                  | 536                                                   | 536                    | 2750                  | 1120                   |
|                                                                                                 |                 | MF Pretreated     | 11.45                | 30.74            | 2980             | 4300         | 1990                                                  | 521                                                   | 521                    | 2770                  | 1110                   |
|                                                                                                 | Reverse Osmosis | Duplicate         | 11.42                | 32.69            | 2920             | 4300         | 1940                                                  | 536                                                   | 536                    | 2750                  | 1120                   |
|                                                                                                 |                 | Non-MF Pretreated | 11.39                | 32.17            | 3340             | 3350         | 1230                                                  | 895                                                   | 895                    | 2520                  | 1090                   |
|                                                                                                 |                 | Duplicate         | 11.32                | 32.20            | 3390             | 3380         | 1260                                                  | 667                                                   | 667                    | 2500                  | 1080                   |
| Nanofiltration                                                                                  | Test 1          | 11                |                      |                  |                  |              |                                                       |                                                       |                        |                       |                        |
|                                                                                                 | Test 2          | 11                |                      |                  |                  |              |                                                       |                                                       |                        |                       |                        |
| Reverse Osmosis                                                                                 | Test 1          | 11                |                      |                  |                  |              |                                                       |                                                       |                        |                       |                        |
|                                                                                                 | Test 2          | 11                |                      |                  |                  |              |                                                       |                                                       |                        |                       |                        |
| Nanofiltration                                                                                  | Test 1          | 11                |                      |                  |                  |              |                                                       |                                                       |                        |                       |                        |
|                                                                                                 | Test 2          | 11                |                      |                  |                  |              |                                                       |                                                       |                        |                       |                        |
| <sup>a</sup> Na <sup>+</sup> concentrations are elevated due to NaOH addition for pH adjustment |                 |                   |                      |                  |                  |              |                                                       |                                                       |                        |                       |                        |

Table 1. Initial Urine Composition - Fouling Tests

168  
169  
170  
171  
172  
173  
  
174  
  
175

**Permeate Composition - Rejection Tests**

| pH    | Conductivity (mS/cm) | Ammonia (mg/L N) | Total N (mg/L N) | TOC (mg/L C) | NO <sub>3</sub> <sup>-</sup> (mg/L N) | NO <sub>2</sub> <sup>-</sup> (mg/L N) | PO <sub>4</sub> <sup>3-</sup> (mg/L P) | SO <sub>4</sub> <sup>2-</sup> (mg/L SO <sub>4</sub> ) | Ca <sup>2+</sup> (mg/L Ca) | Mg <sup>2+</sup> (mg/L Mg) |
|-------|----------------------|------------------|------------------|--------------|---------------------------------------|---------------------------------------|----------------------------------------|-------------------------------------------------------|----------------------------|----------------------------|
| 11.35 | 2.72                 | 3870             | 4266             | 77           | 3.8                                   | 0.9                                   | 2.9                                    | 23.9                                                  | 1.4                        | 1.3                        |
| 11.45 | 2.89                 | 4420             | 4156             | 50           | 4.4                                   | 1.1                                   | 3.3                                    | 26.1                                                  | 1.2                        | 1.2                        |
| 11.63 | 4.72                 | 4540             | 4074             | 61           | 4.4                                   | 1.1                                   | 3.3                                    | 26.1                                                  | 1.2                        | 1.2                        |
| 11.54 | 4.51                 | 4515             | 4207             | 52           | 4.4                                   | 1.1                                   | 3.3                                    | 26.1                                                  | 1.2                        | 1.2                        |

condition for pH adjustment

176

177 **3. References**

179 1. H. Ray, F. Perreault and T. H. Boyer, Rejection of nitrogen species in real fresh  
180 and hydrolyzed human urine by reverse osmosis and ultrafiltration, *J.*  
182 *Environ. Chem. Eng.*, 2020, **8**, 103993.  
184 2. S. Chellam, C. Serra and M. Wiesner, Estimating Carbon Footprint of Integrated  
186 membrane systems, *Journal American Water Works Association - JAMER*  
188 *WATER WORK ASSN*, 1998, **90**, 96-104.  
190 3. Alibaba webpage, <https://www.alibaba.com/>, (accessed 2020).  
192 4. F. Volpin, H. Heo, M. A. Johir, J. Cho, S. Phuntsho and S. Shon, Techno-  
194 economic feasibility of recovering phosphorus, nitrogen and water  
196 from dilute human urine via forward osmosis, *Water Res.* 2019, **150**, 47-  
198 55.  
200 5. H. Ray, F. Perreault and T. H. Boyer, Ammonia Recovery from Hydrolyzed  
202 Human Urine by Forward Osmosis with Acidified Draw Solution,  
204 *Environmental Science & Technology*, 2020, **54**, 1555-1565.  
206 6. B. X. Liu, A. Giannis, J. F. Zhang, V. W. C. Chang and Y. Wang, Air  
208 stripping process for ammonia recovery from source-separated urine:  
209 modeling and optimization, *J. Chem. Technol. Biotechnol.*, 2015, **90**, 2208-  
211 2217.  
213 7. W. A. Tarpeh, K. M. Udert and K. L. Nelson, Comparing Ion Exchange  
214 Adsorbents for Nitrogen Recovery from Source-Separated Urine,  
216 *Environmental Science & Technology*, 2017, **51**, 2373-2381.  
218 8. W. A. Tarpeh, I. Wald, M. O. Omollo, T. Egan and K. L. Nelson, Evaluating  
220 ion exchange for the nitrogen recovery from source-separated urine in Nairobi,  
222 Kenya, *Development Engineering*, 2018, **3**, 188-195.

224

225
